# Supplementary material
Source: Springer Nature journal article supplement (https://www.springermedizin.de/resource/supplementary/12872_2014_773_MOESM4_ESM.pdf/9430460)

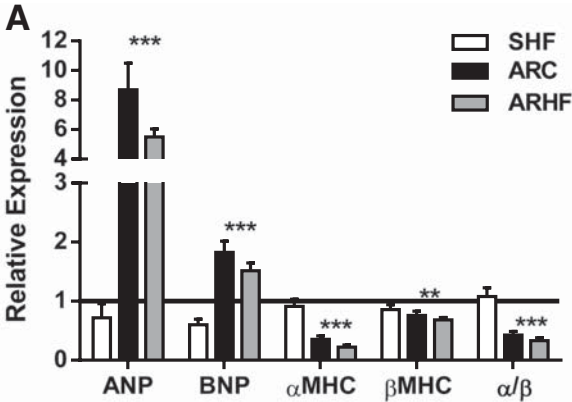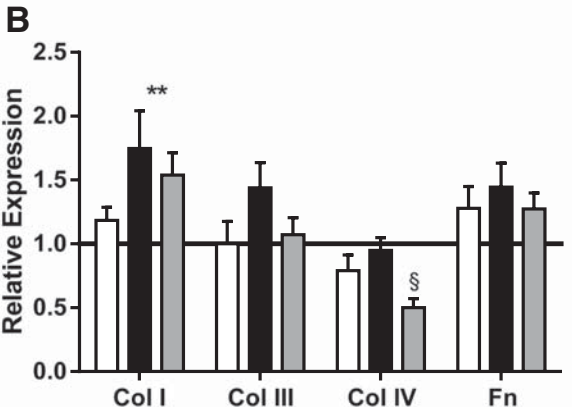

Supplement: MOESM4 [file 9430460]
